# Supplementary material
Source: PubMed Central journal article supplement (PMC4559849)

## SUPPLEMENTAL FIGURE LEGEND

**Supplementary Figure S1.** (A) Graph and photos of nuclear HIF-1 $\alpha$  staining in HT1080 tumor groups. Scale bar = 20  $\mu$ m. (B) Graph and photos of carbonic anhydrase 9 (CA9) cytoplasmic staining in HT1080 tumor groups. Scale bar = 5  $\mu$ m. Bars represent standard deviation. \* $p < 0.05$  compared to control IgG group, \*\* $p < 0.05$  compared to all other groups.

**Supplementary Figure S2.** (A) Immunofluorescence photos of extremity sarcoma samples in *LSL-Kras<sup>G12D/+</sup>/Trp53<sup>fl/fl</sup>* mice (KP mice) following staining for CD31 (red) and TUNEL (green). Groups were treated with control IgG 20 mg/kg 3 times per week, DC101 20 mg/kg 3 times per week, RT 10 Gy times 2, and/or metronomic doxorubicin (Dox) 1 mg/kg 3 times per week. Arrows point to TUNEL and CD31 positive cells. Scale bar = 10  $\mu$ m. (B) Graph showing number of CD31 positive EC with TUNEL staining per 5 fields for each treatment group. Bars represent standard deviation. \* $p < 0.05$  compared to control IgG group, \*\* $p < 0.05$  compared to all other groups.

**Supplementary Figure S3.** Graphs showing Comet assay mean tail moment (A),  $\gamma$ H2AX expression (B), and cleaved caspase 3 expression (C) of tumor EC following withdrawal of VEGF (No VEGF), RT (6 Gy), and/or TH-302 (10  $\mu$ M). All experiments were performed in normoxia and hypoxia. Bars represent standard deviation. \* $p < 0.05$  compared to all other groups.

**Supplementary Figure S4.** Graph and immunofluorescence photos of  $\gamma$ H2AX expression (blue) (A) and cleaved caspase 3 expression (red) (B) in HT1080 and MS4515 cells following treatment with control DMSO, low dose doxorubicin (DOX, 0.005  $\mu$ M), and/or RT (8 Gy). All experiments were performed in normoxia (21% O<sub>2</sub>) and hypoxia (1% O<sub>2</sub>). Scale bar = 5  $\mu$ m.

A

HIF-1 $\alpha$

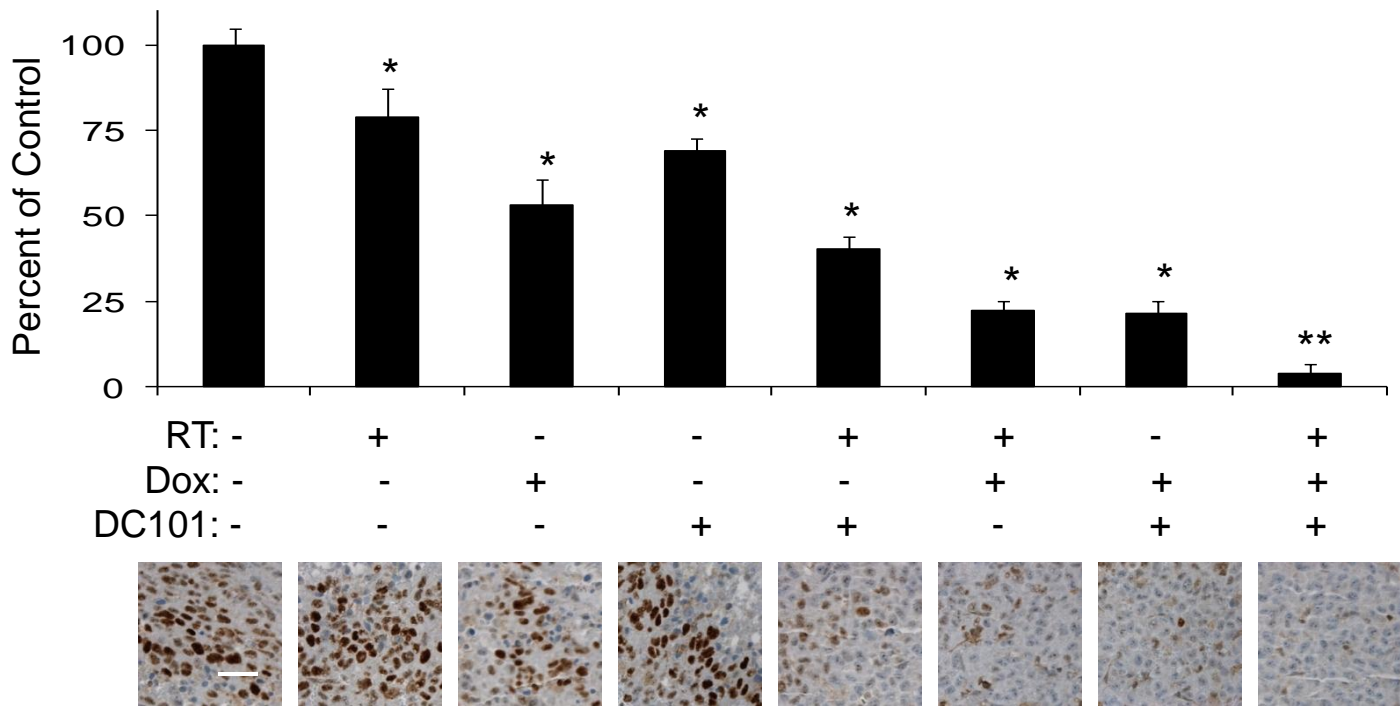

B

CA9

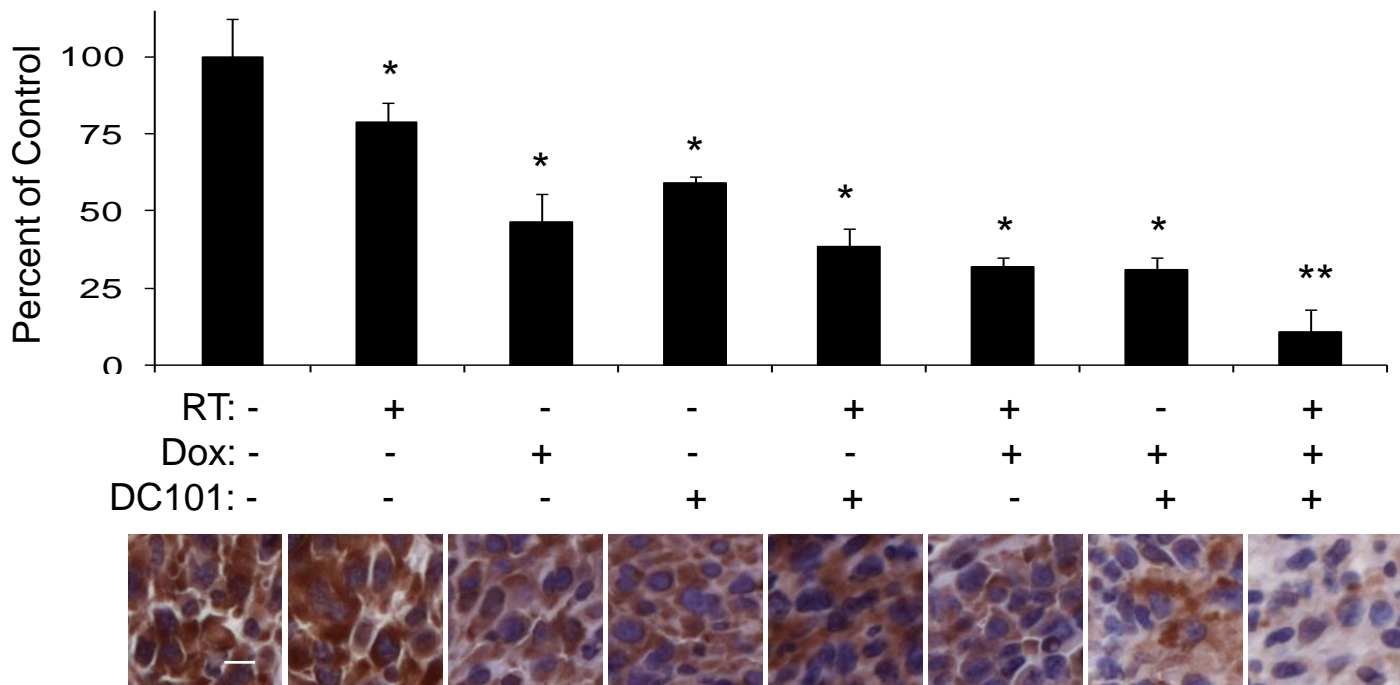

Lee HJ et al. Supplementary Figure S2

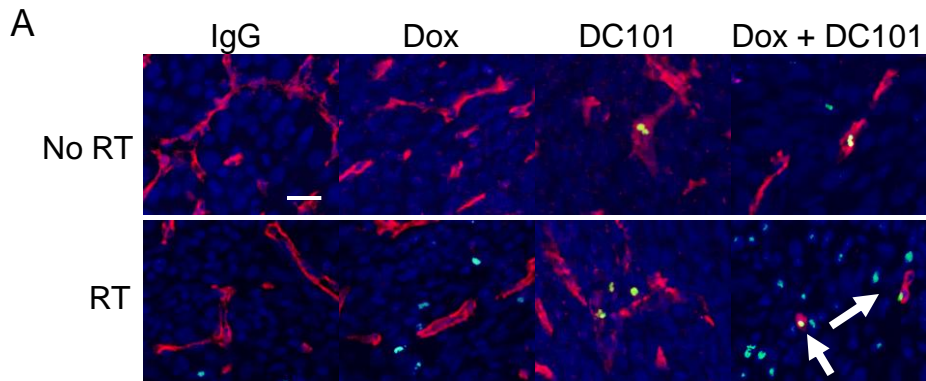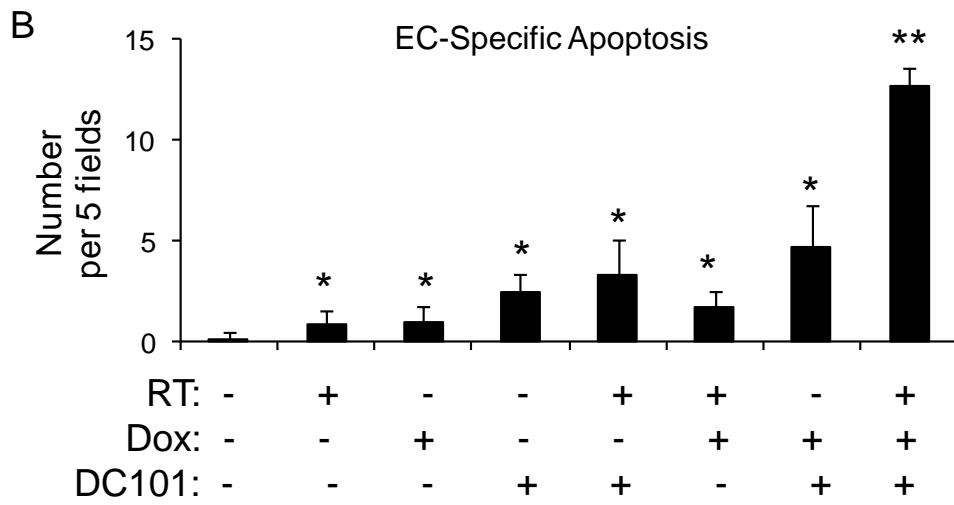

A

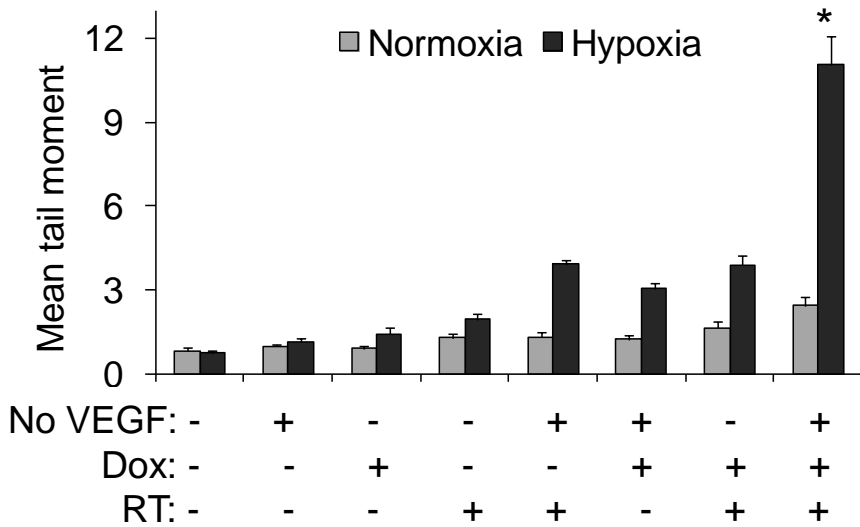

B

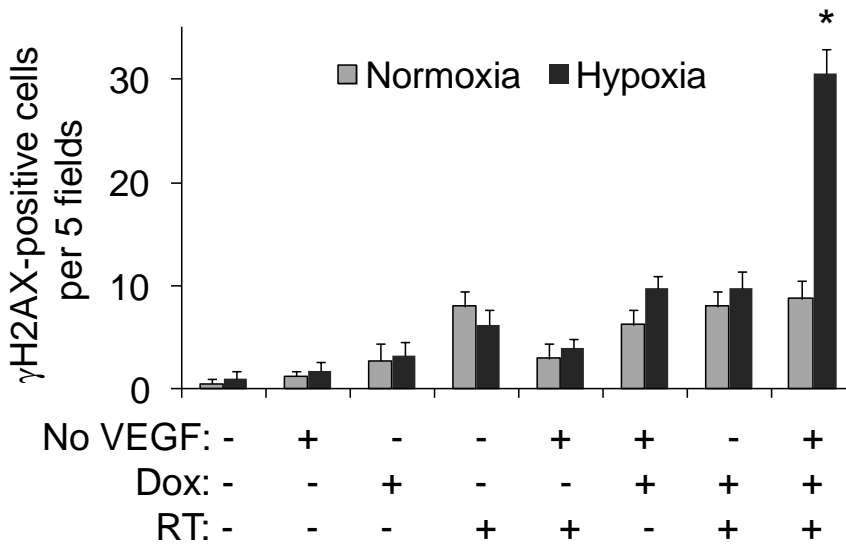

C

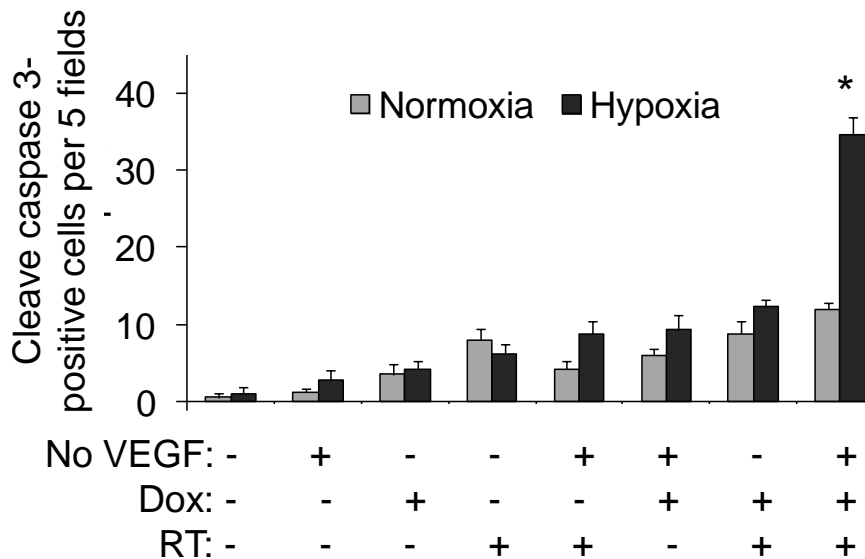

Lee HJ et al. Supplemental Figure S4

A

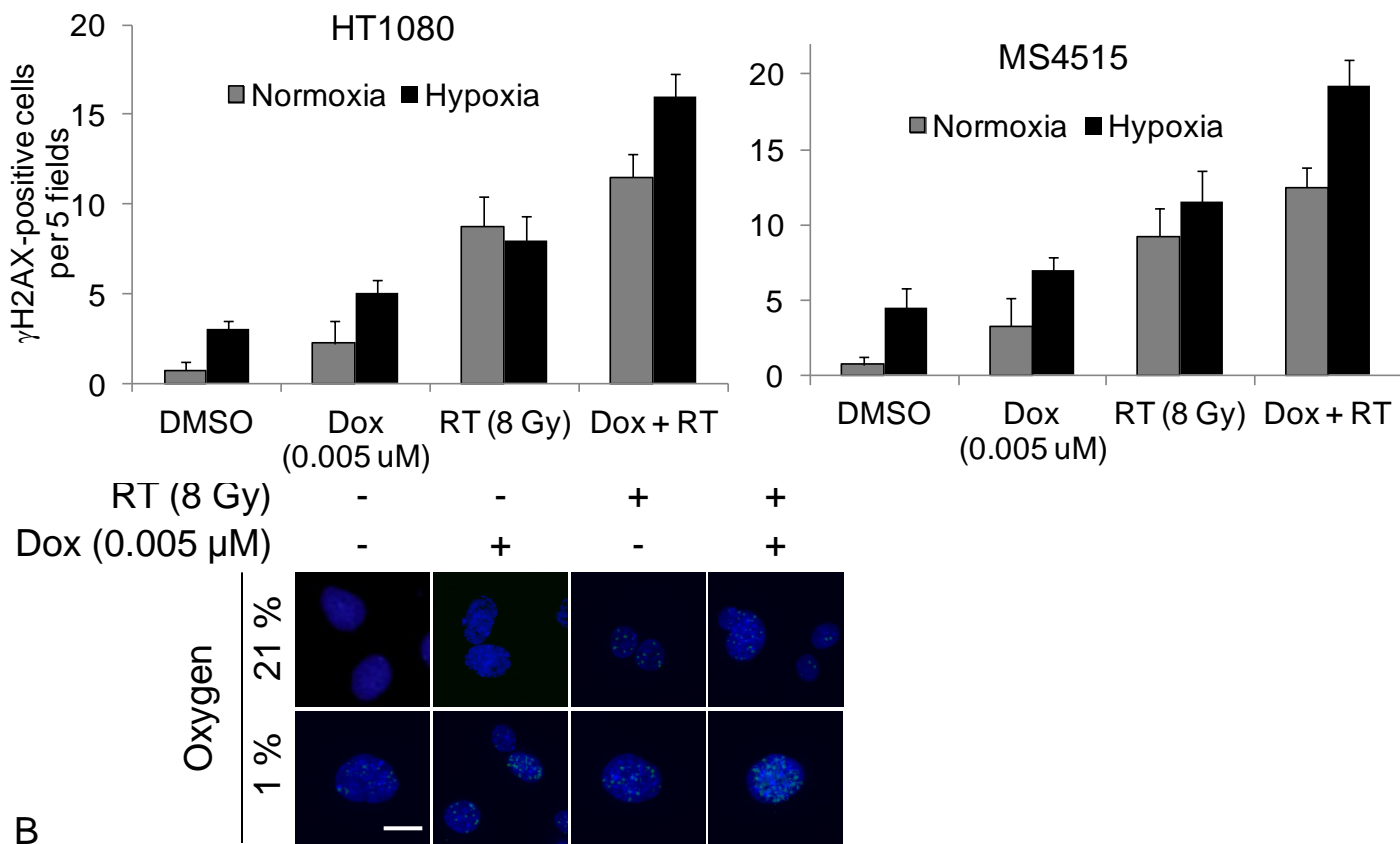

B

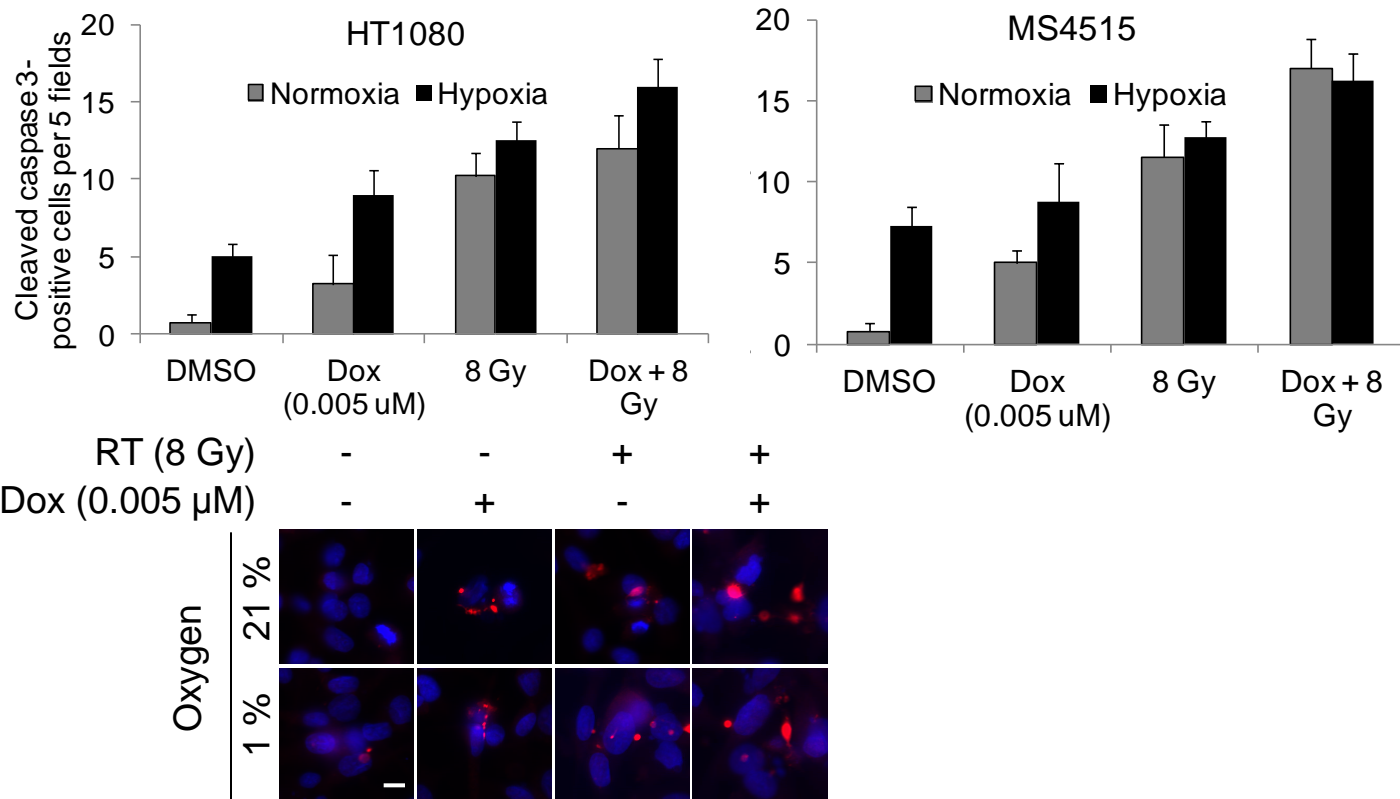

Supplement: NIHMS719476-supplement-Supplemental_Figures.pdf [file NIHMS719476-supplement-Supplemental_Figures.pdf]
